# Supplementary material
Source: HighWire-hosted journal article supplement (https://bmjopen.bmj.com/content/8/3/e018680)

# Systolic Blood Pressure

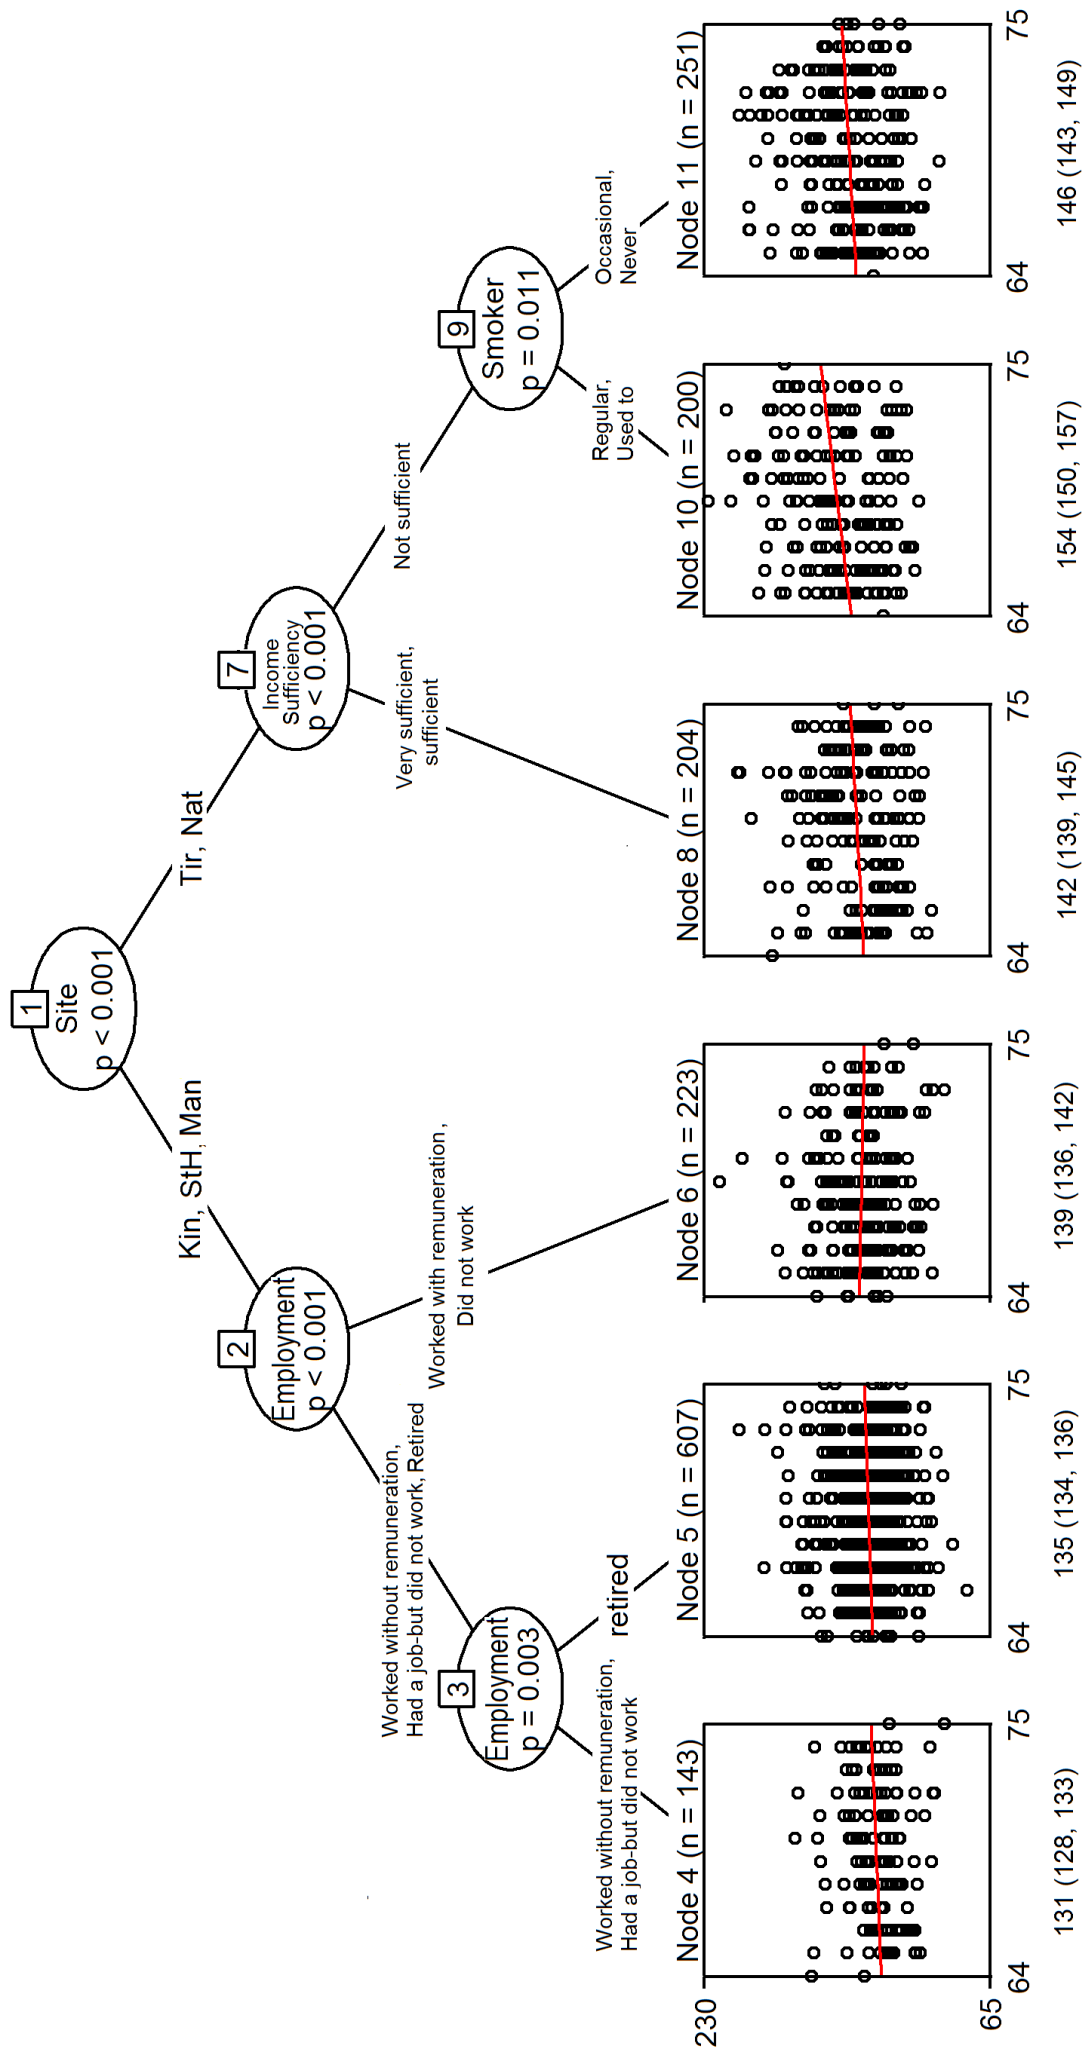

Diastolic Blood Pressure

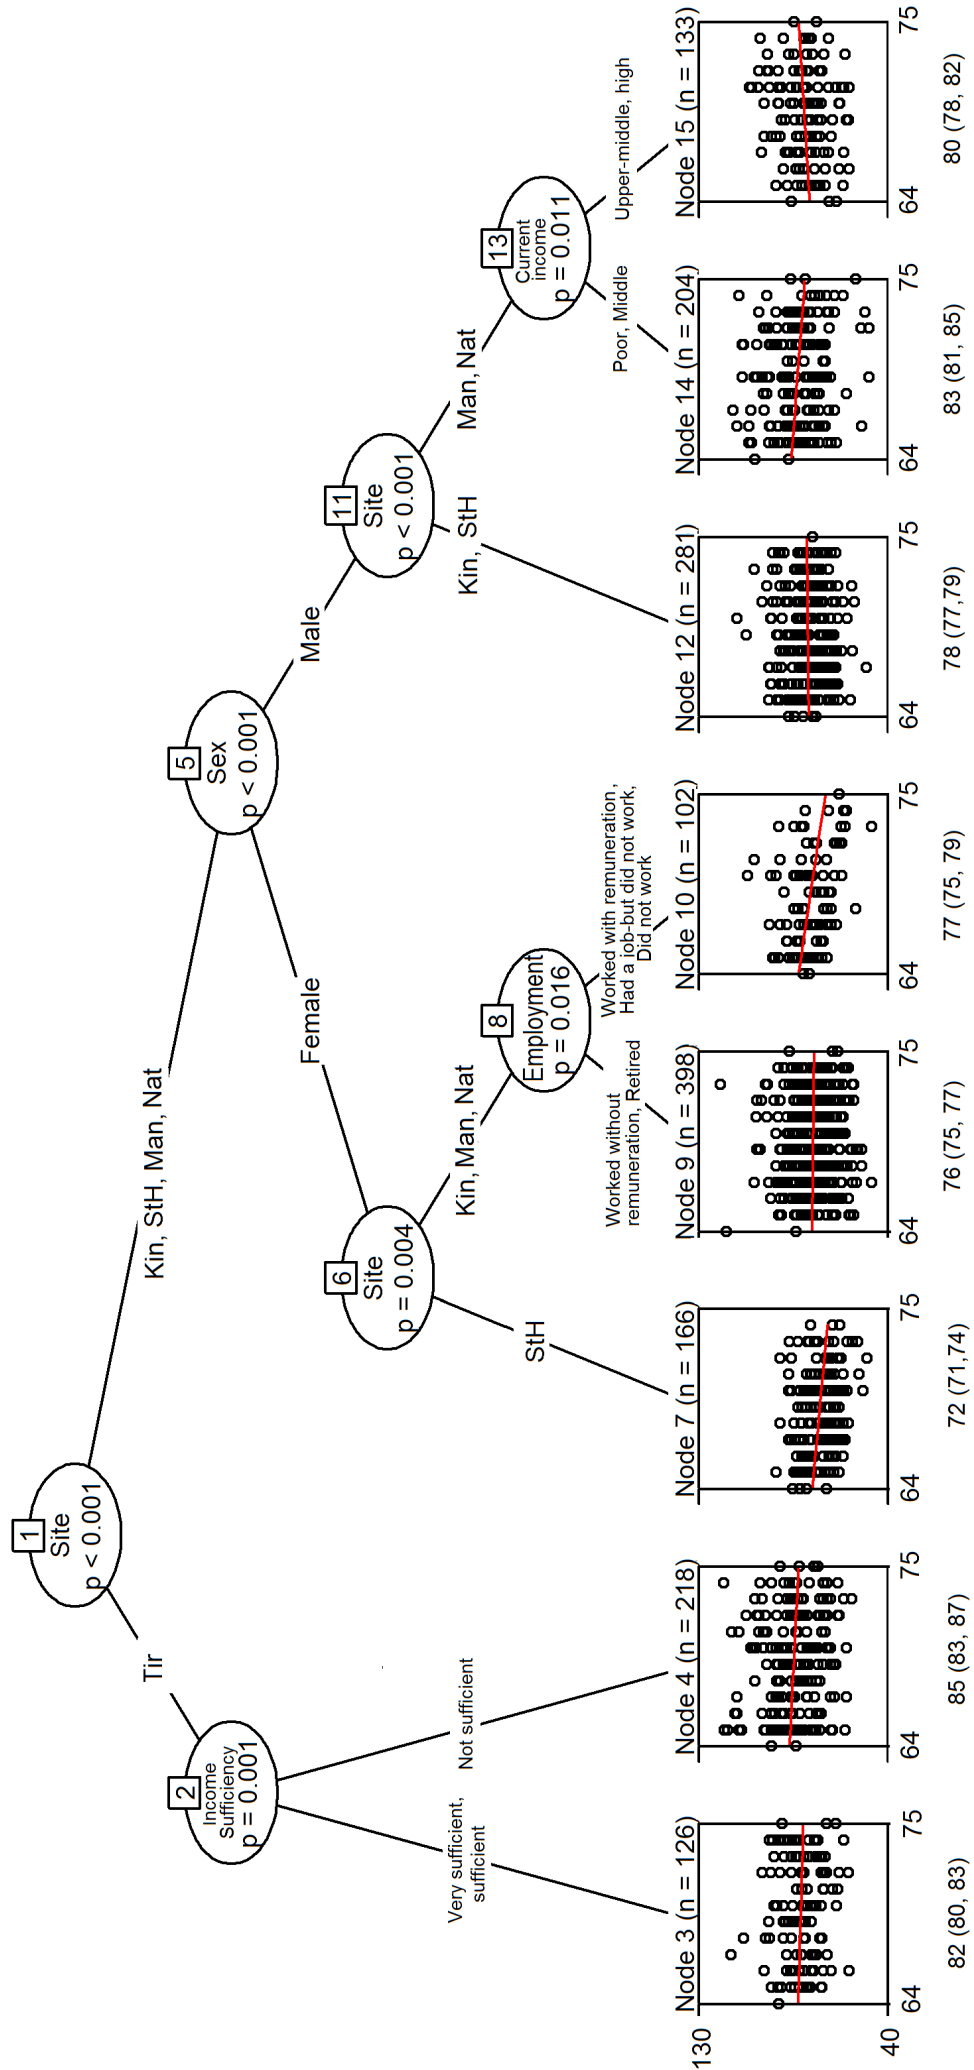

Waist Circumference

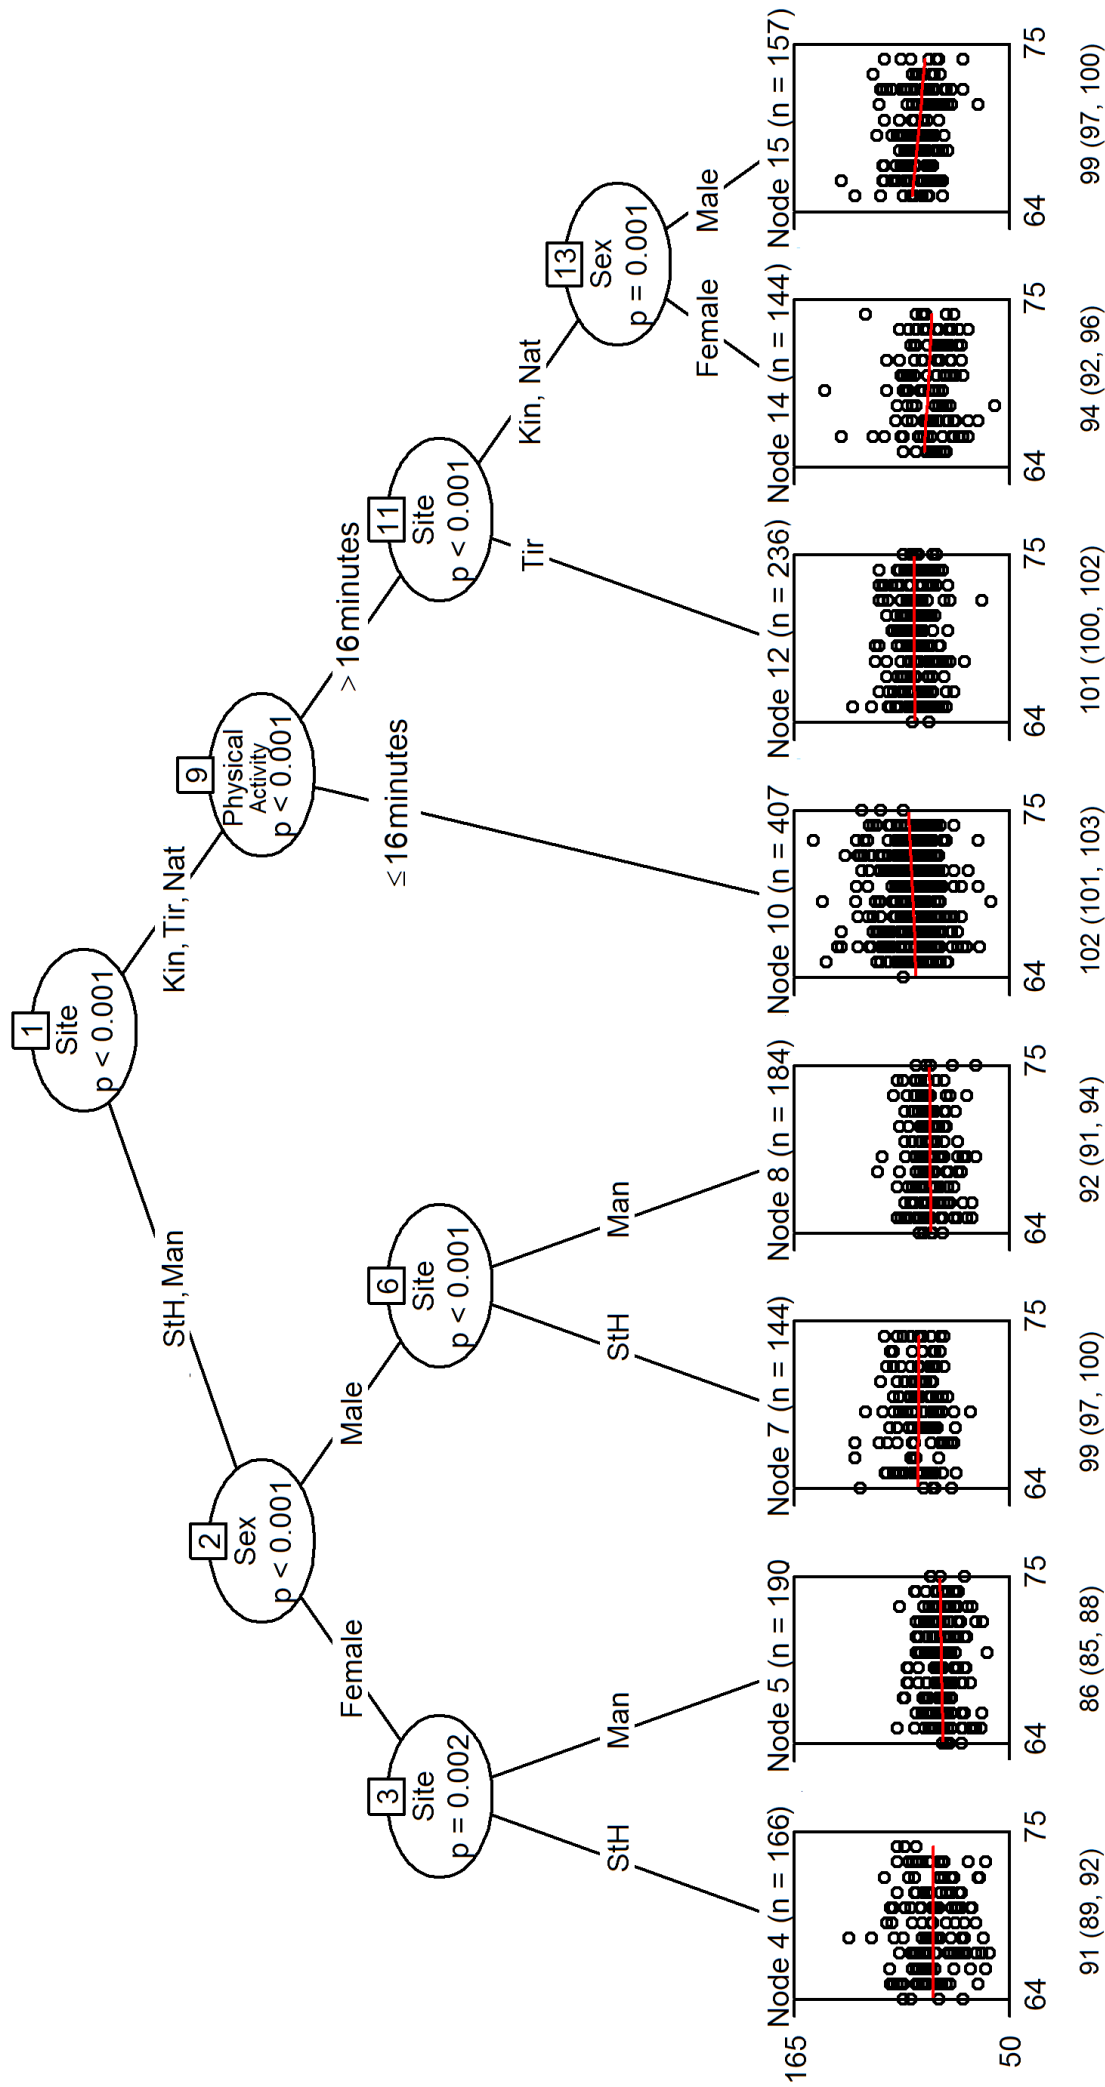

Log HDL

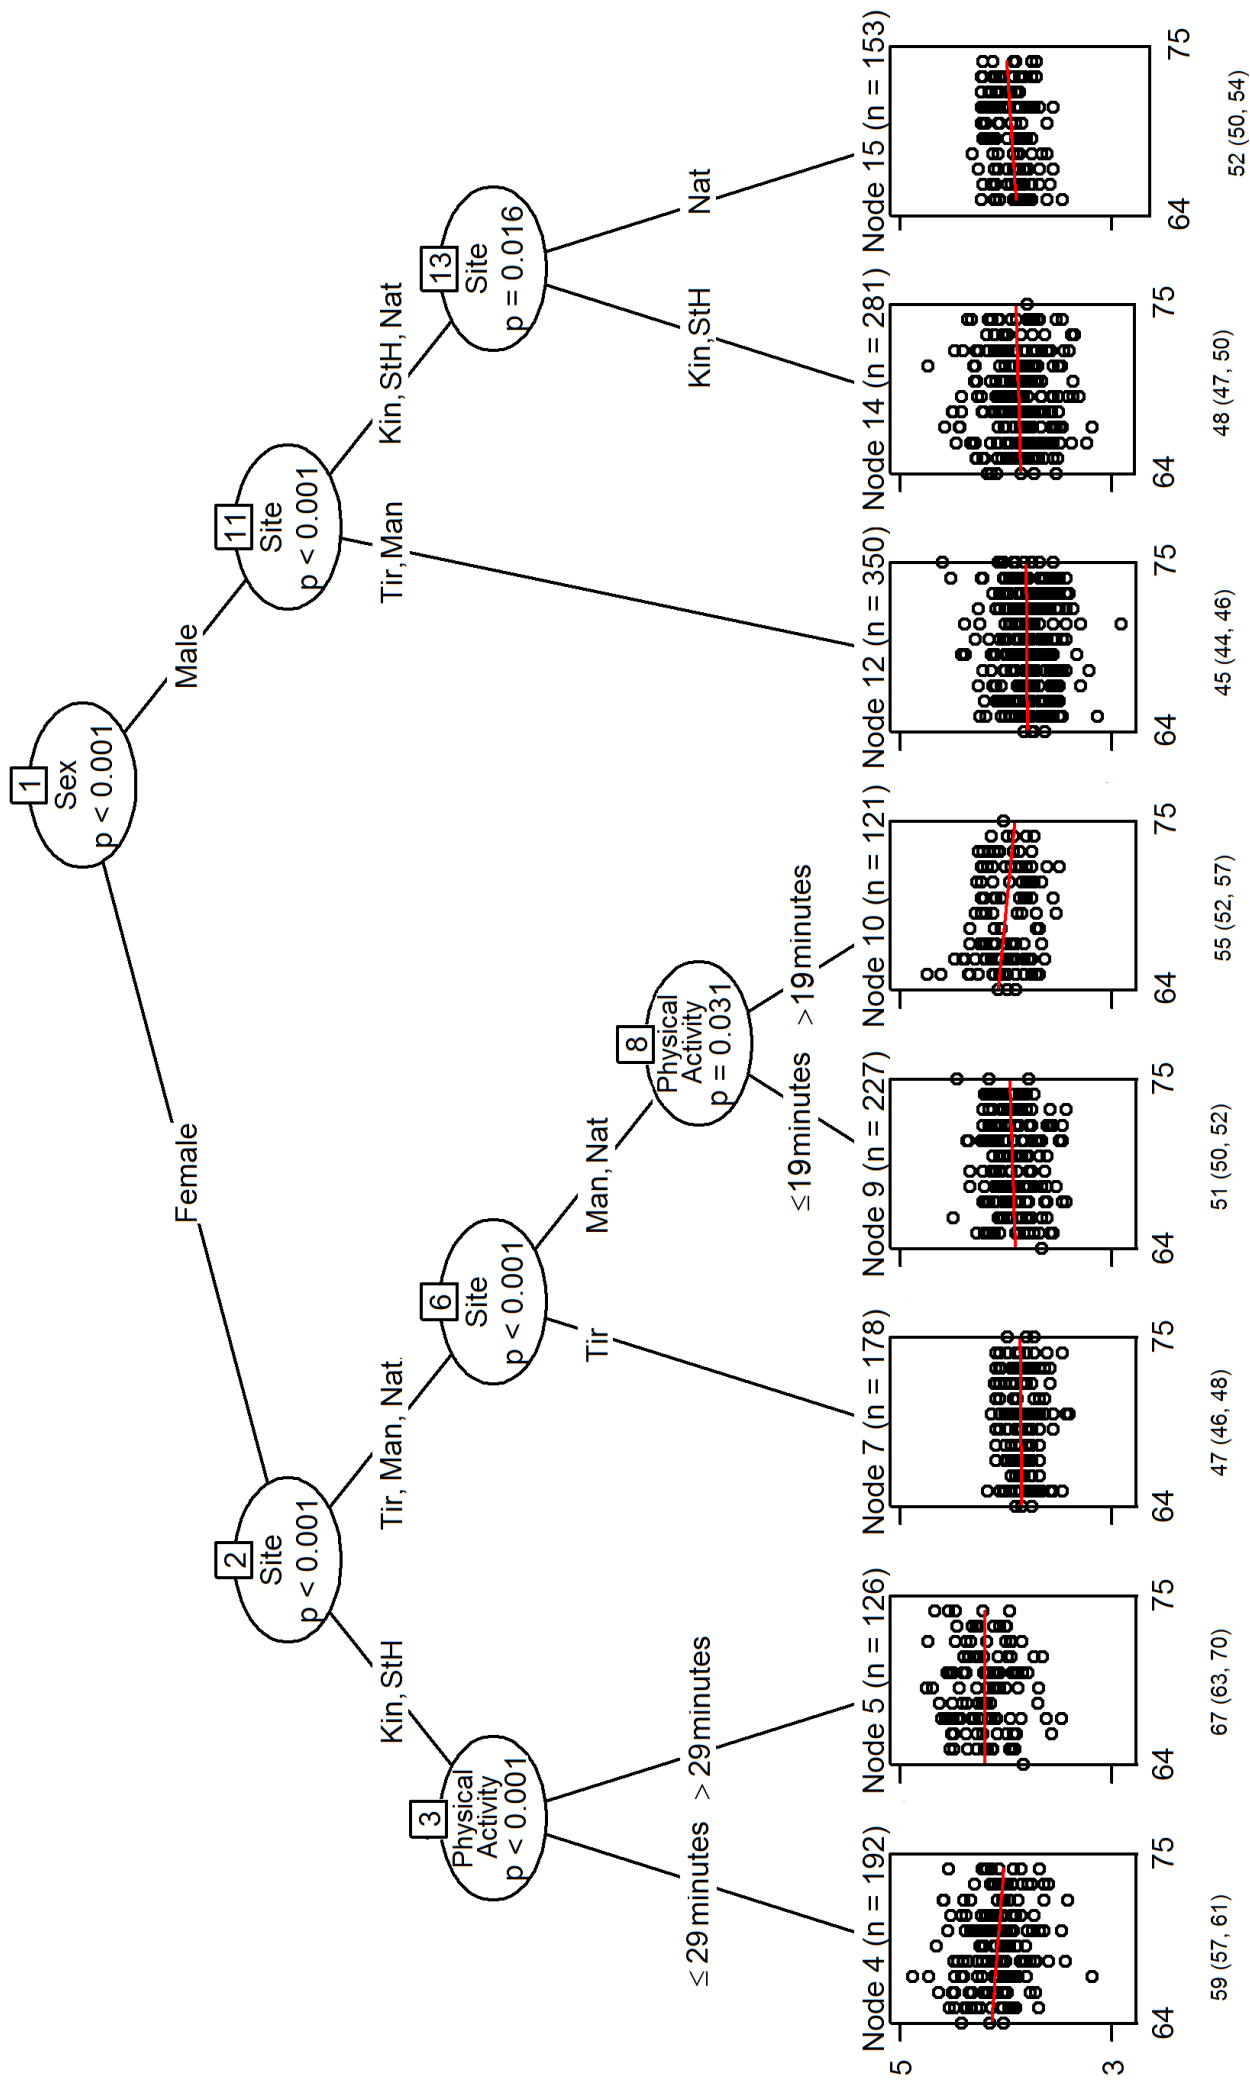

Log Triglycerides

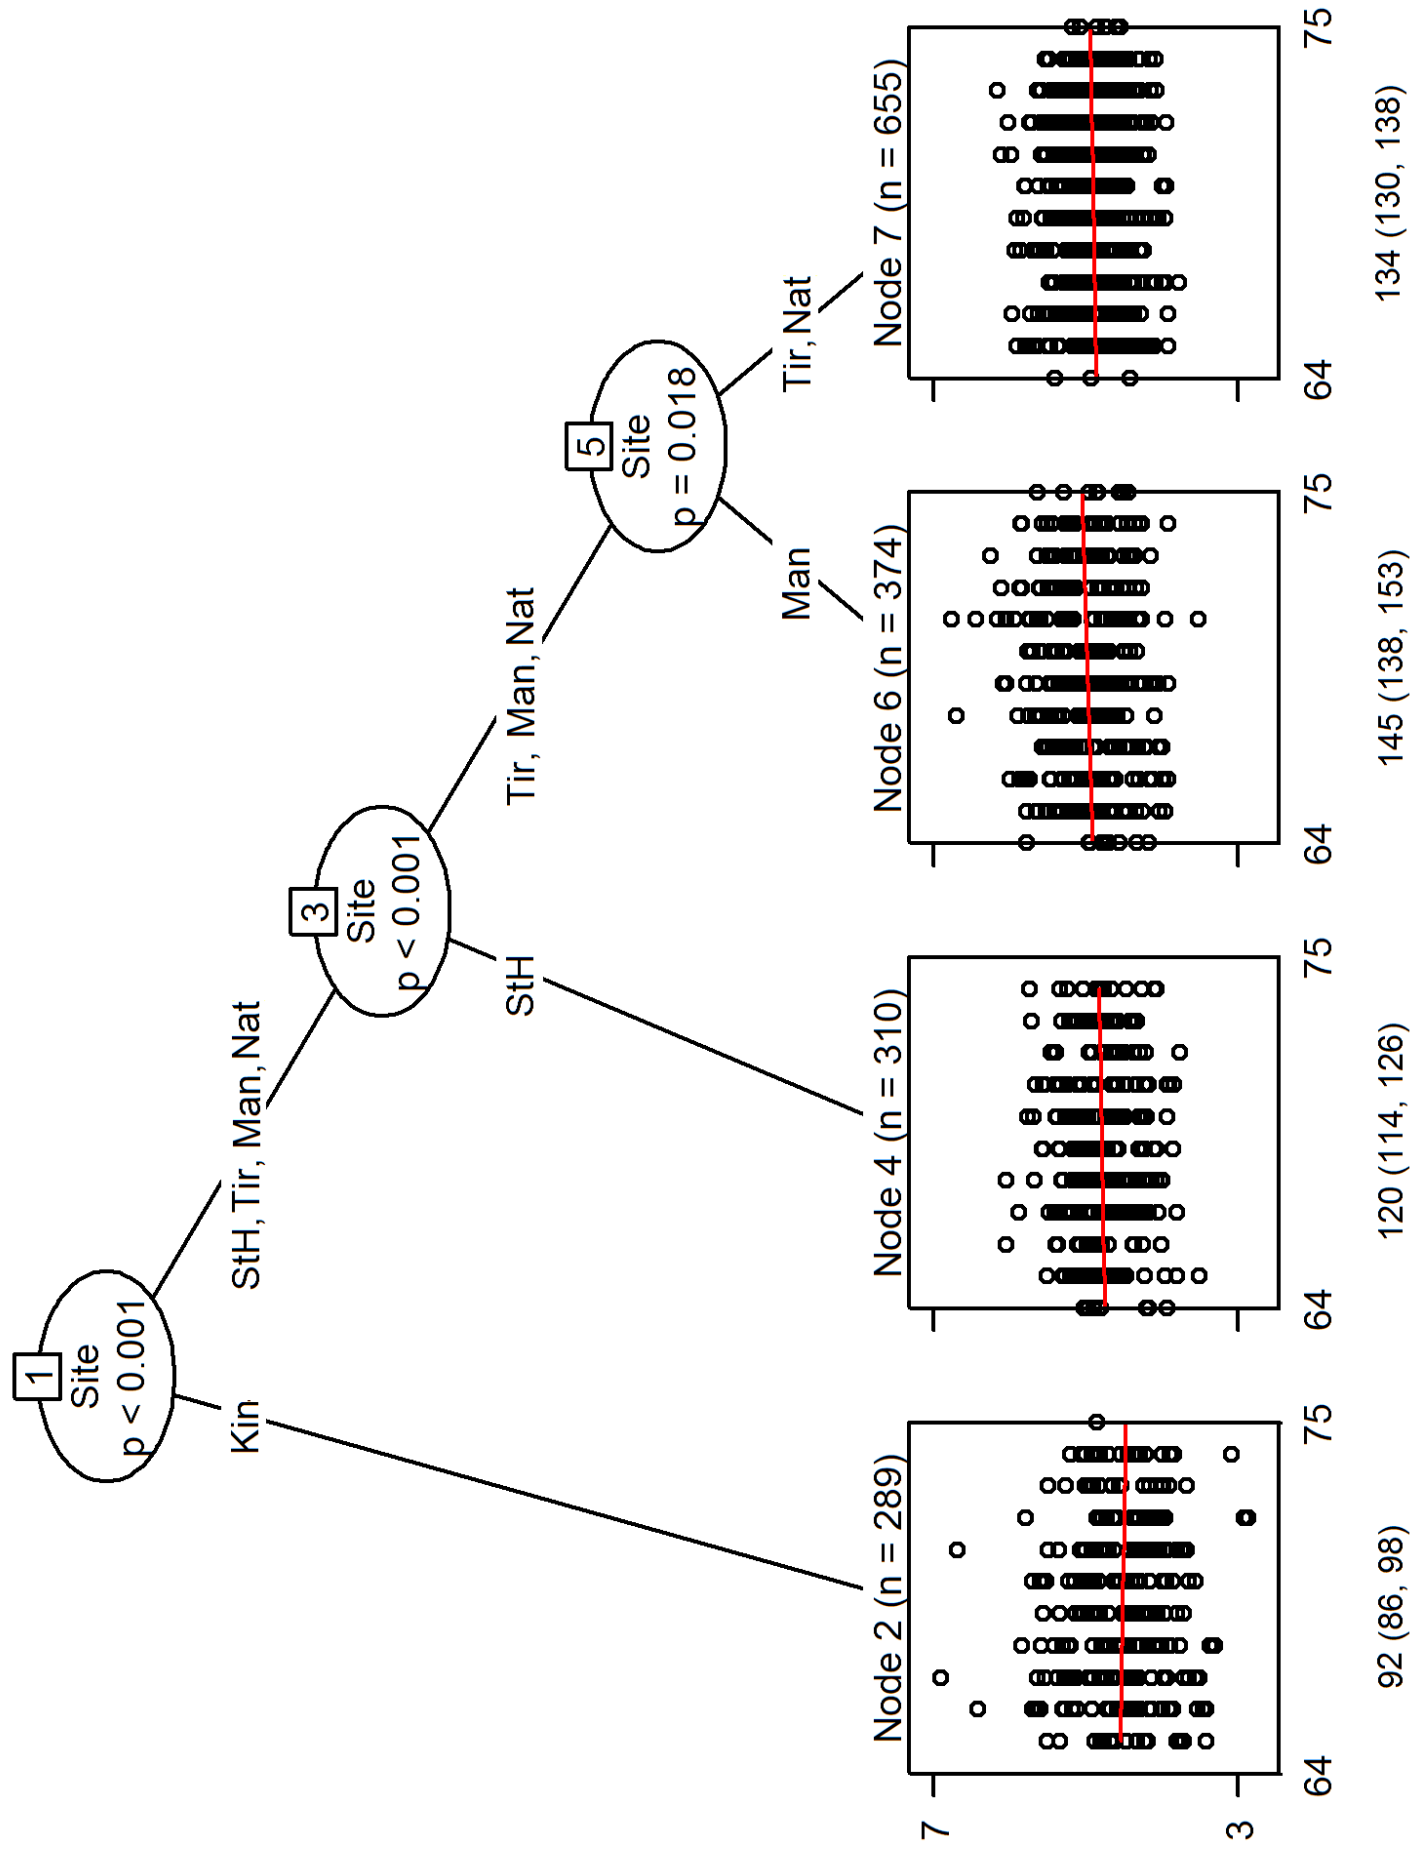

# Log HbA1c

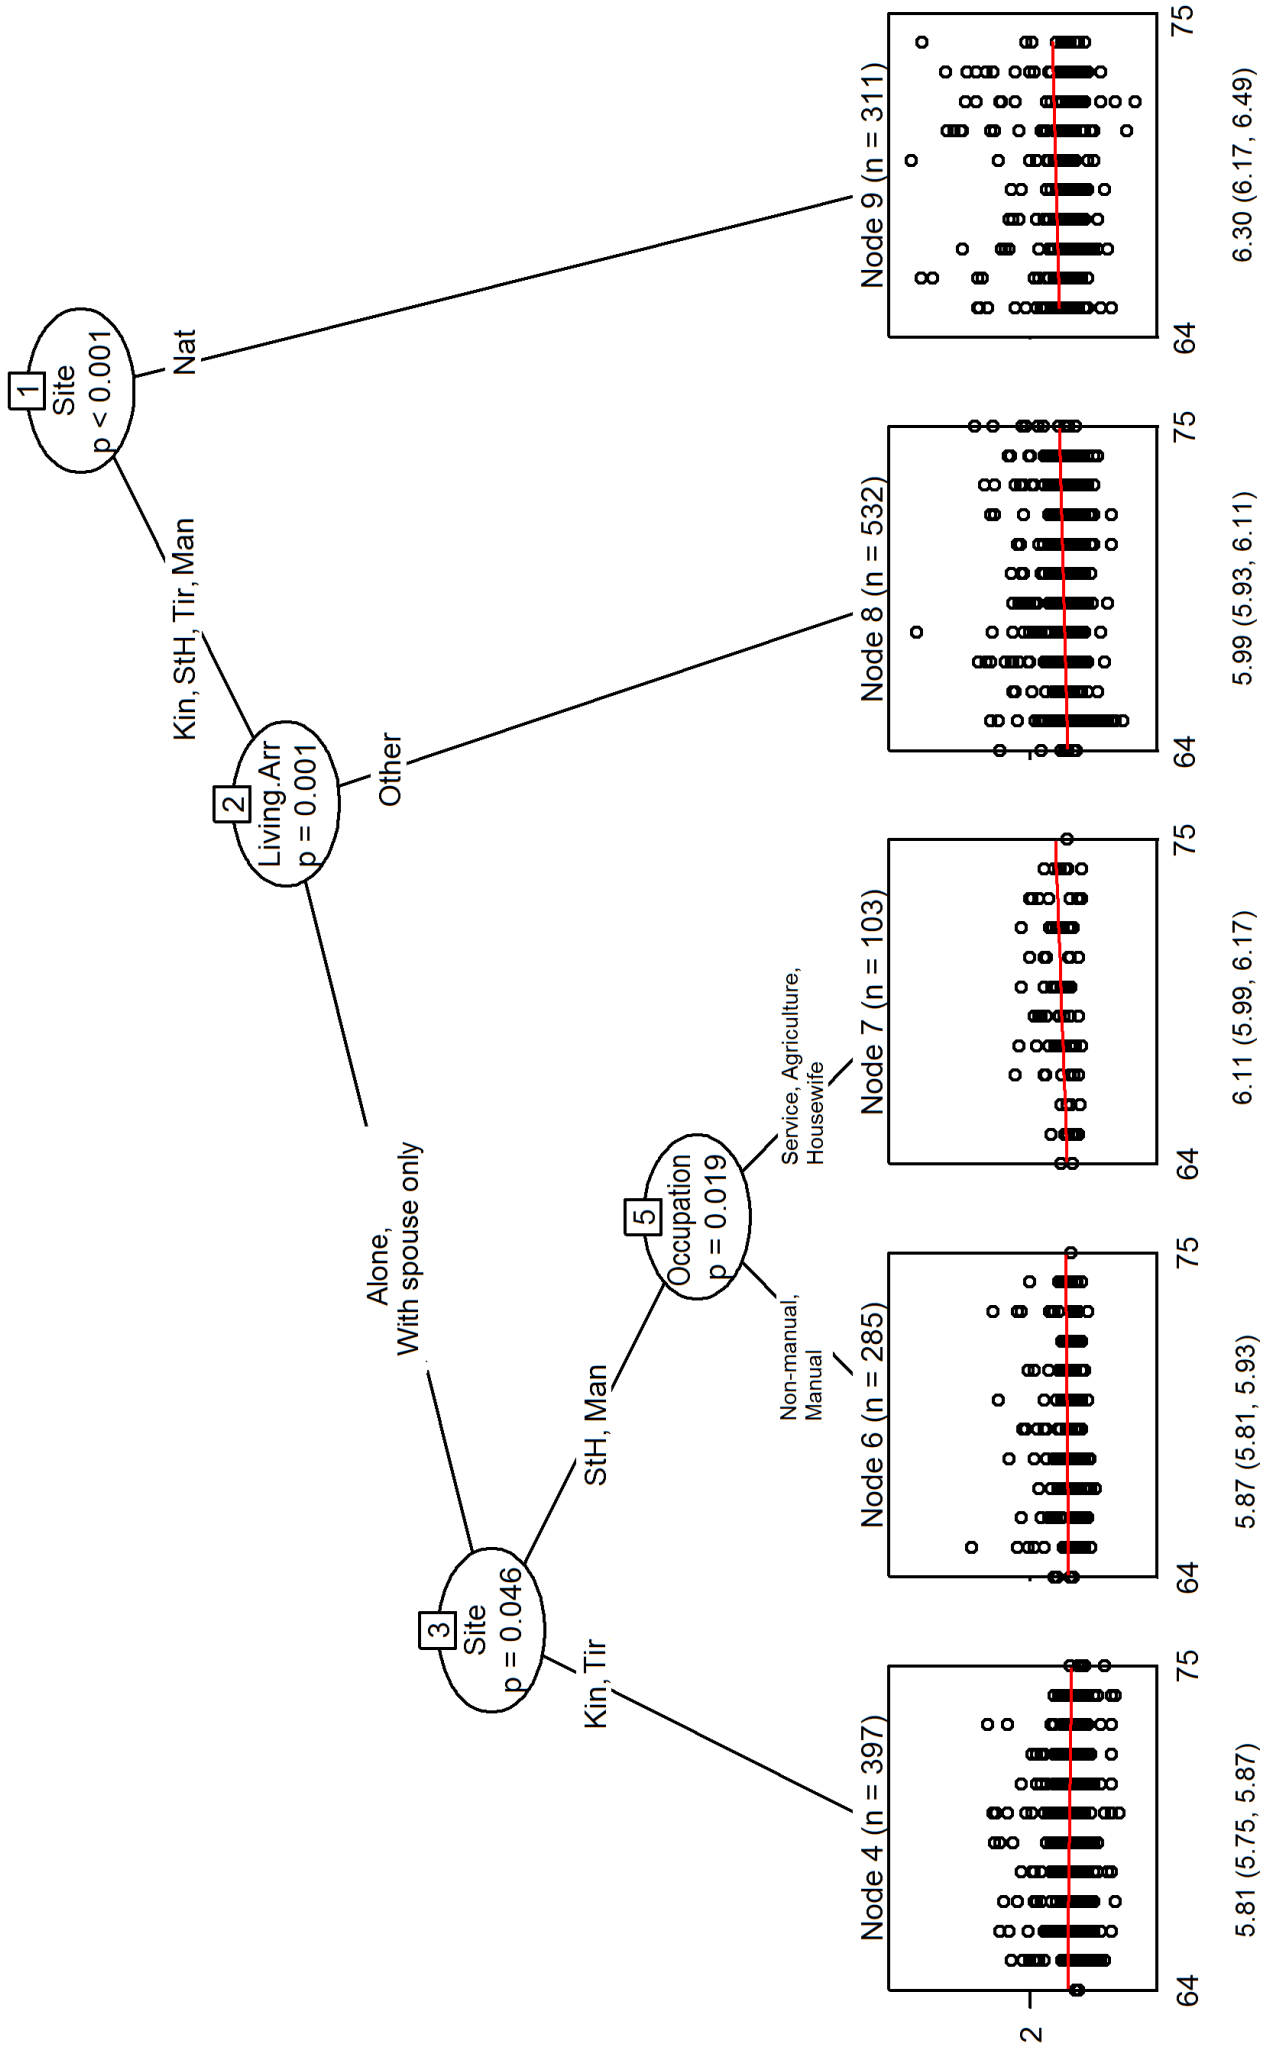

Supplement: inline-supplementary-material-1 [file inline-supplementary-material-1.pdf]
